# Supplementary material for: Efficient and practical synthesis of monoalkyl oxalates under green conditions
Source: Royal Society of Chemistry journal article supplement (doi:10.1039/d2ra04419f), 2022-01-01

## Electronic Supplementary Information

### Efficient and Practical Synthesis of Monoalkyl Oxalates under Green Conditions

Tatiana Barsukova, Takeyuki Sato, Haruki Takumi, and Satomi Niwayama\*

*Graduate School of Engineering, Muroran Institute of Technology*

*27-1, Mizumoto-cho, Muroran, Hokkaido, Japan*

*E-mail: [niwayana@mmm.muroran-it.ac.jp](mailto:niwayana@mmm.muroran-it.ac.jp)*

#### Table of Contents

<sup>1</sup>H NMR and <sup>13</sup>C NMR of the half-esters

S2

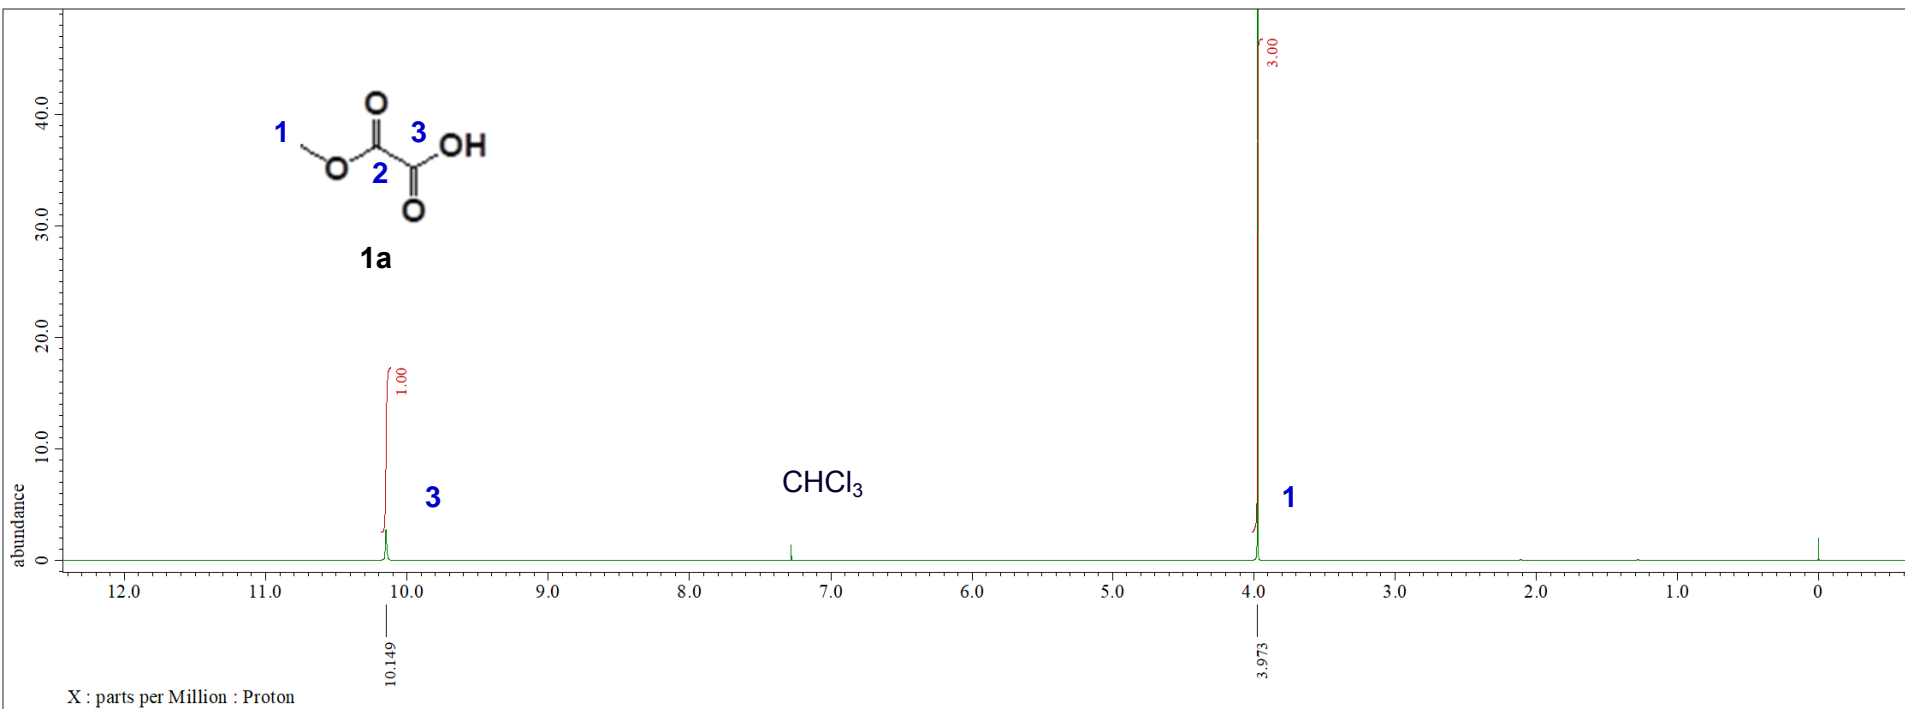

CDCl<sub>3</sub>

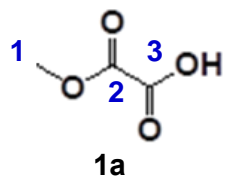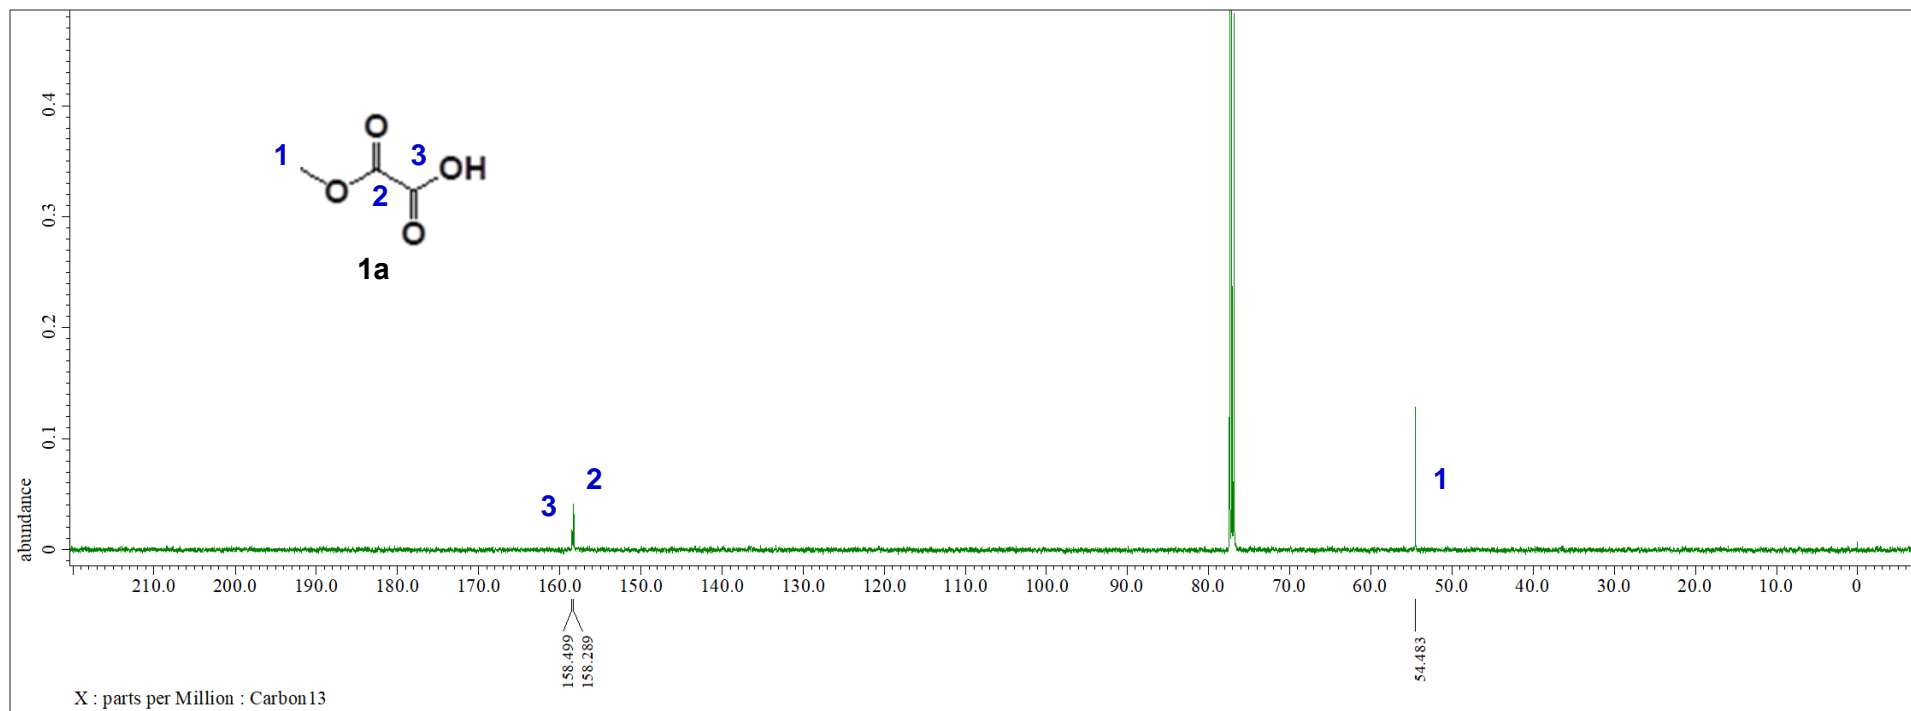

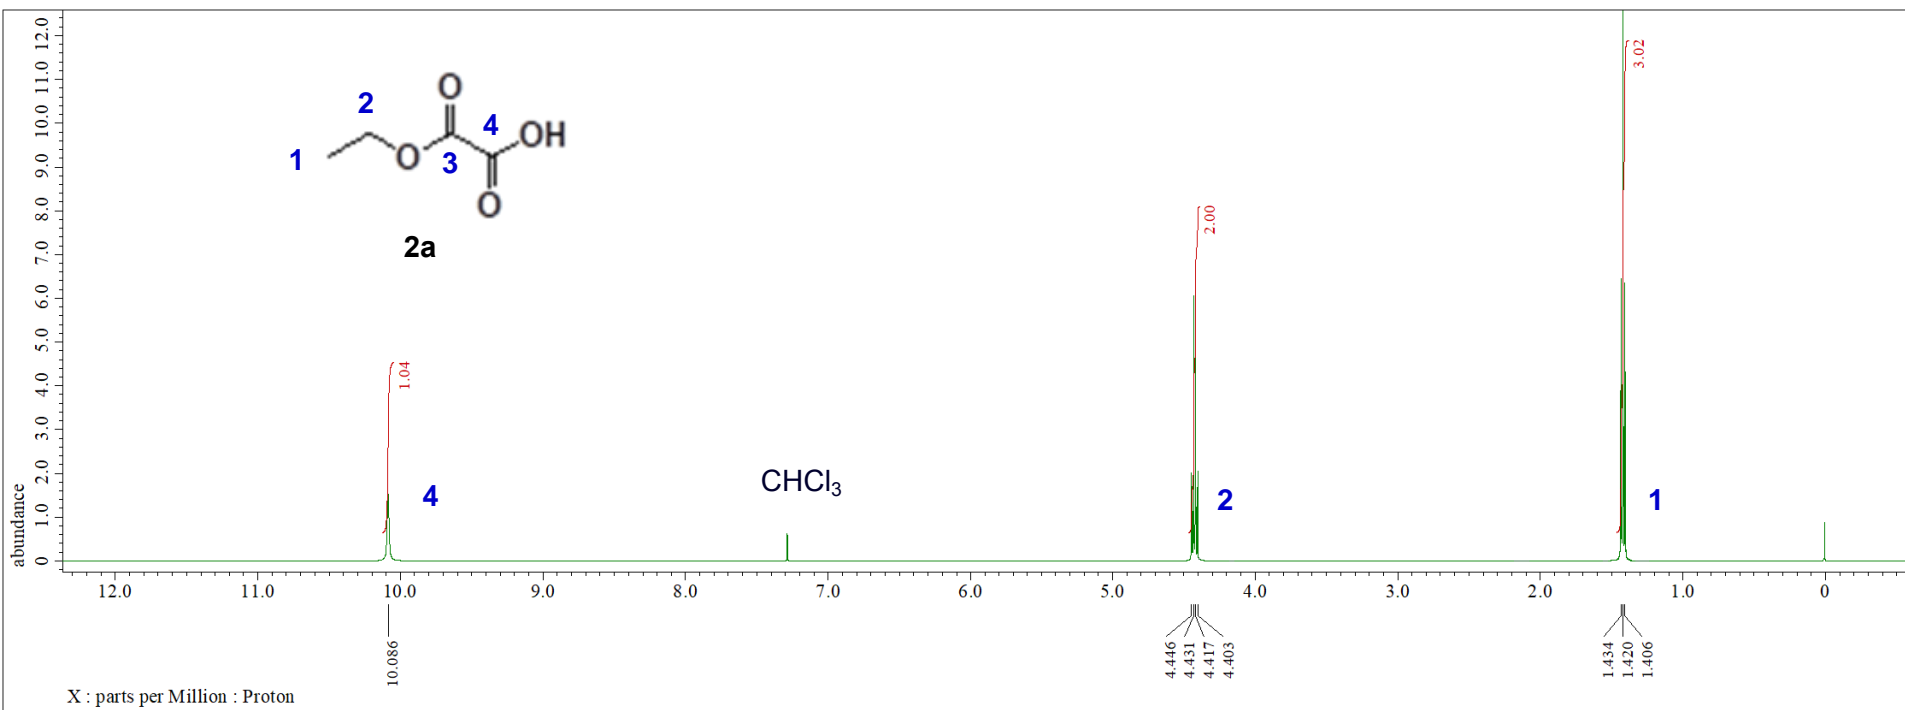

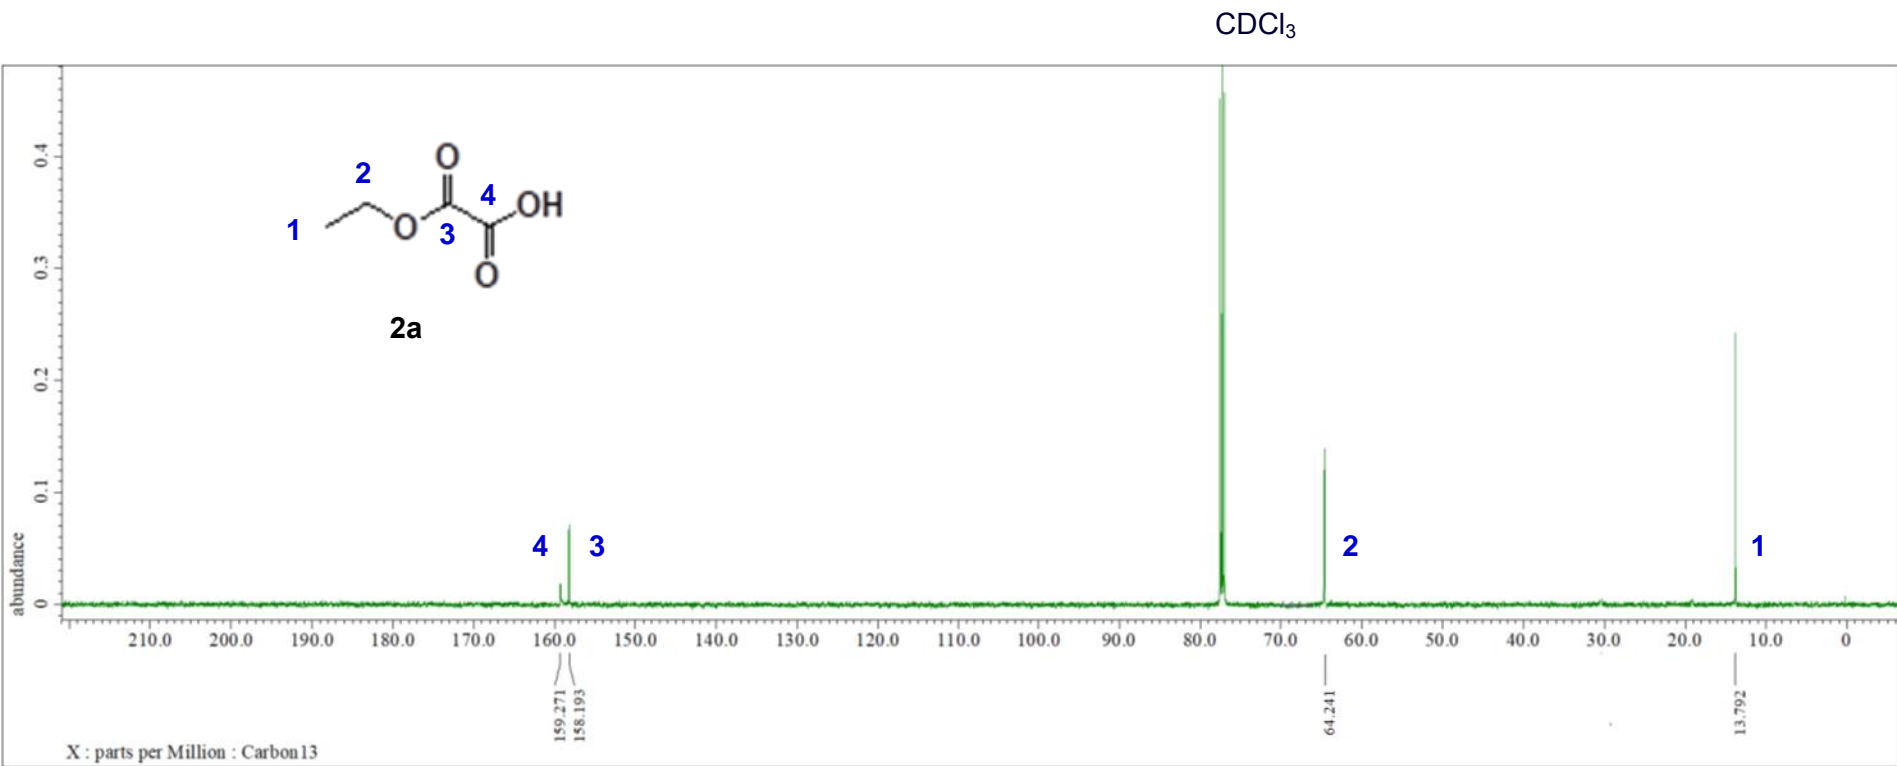

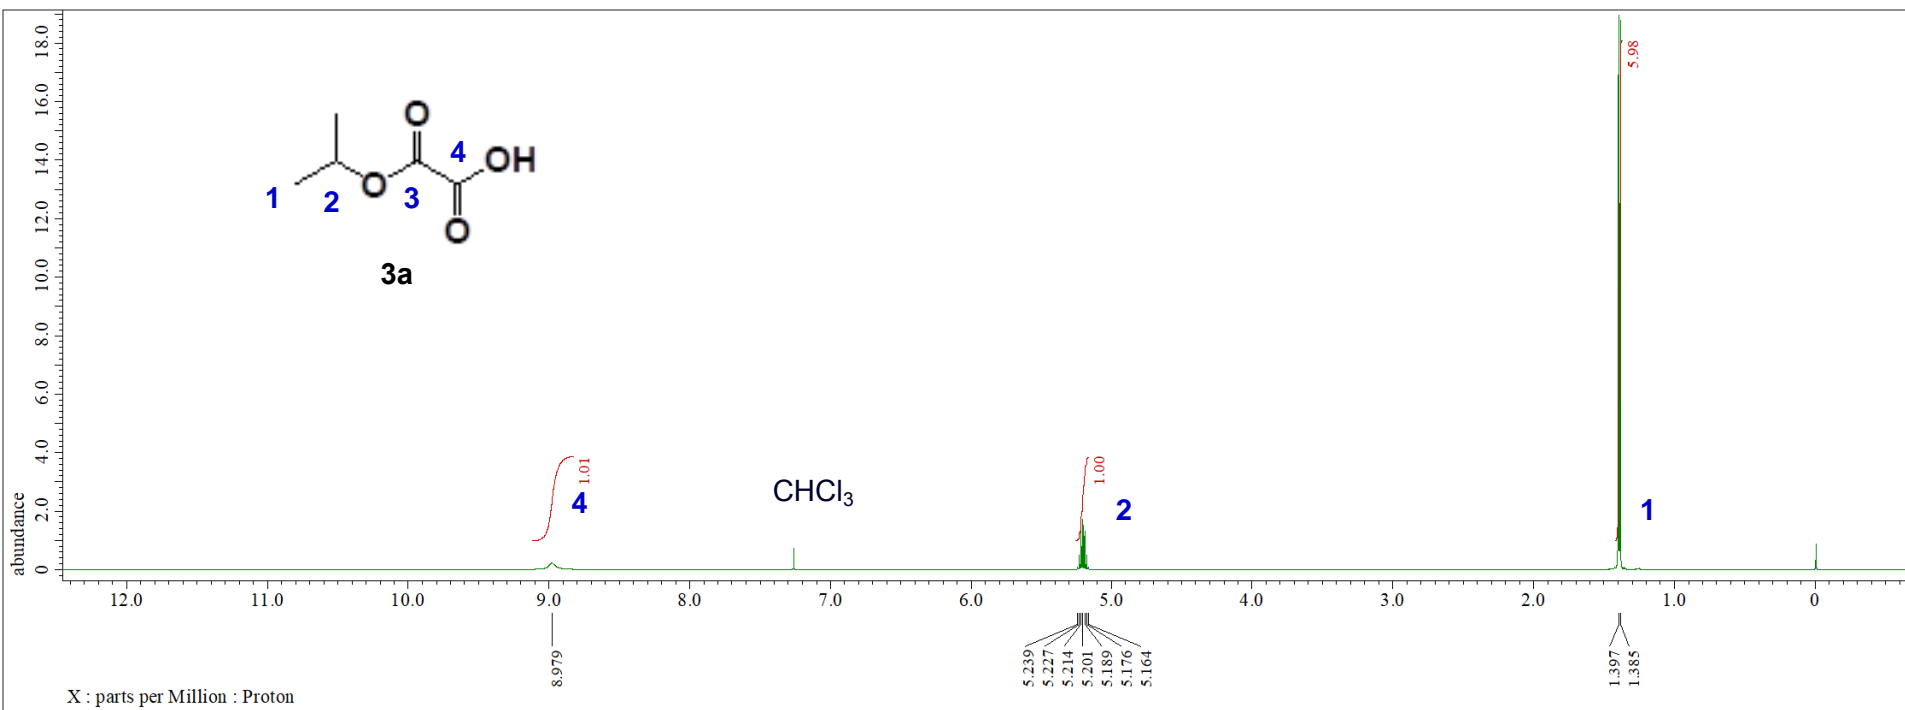

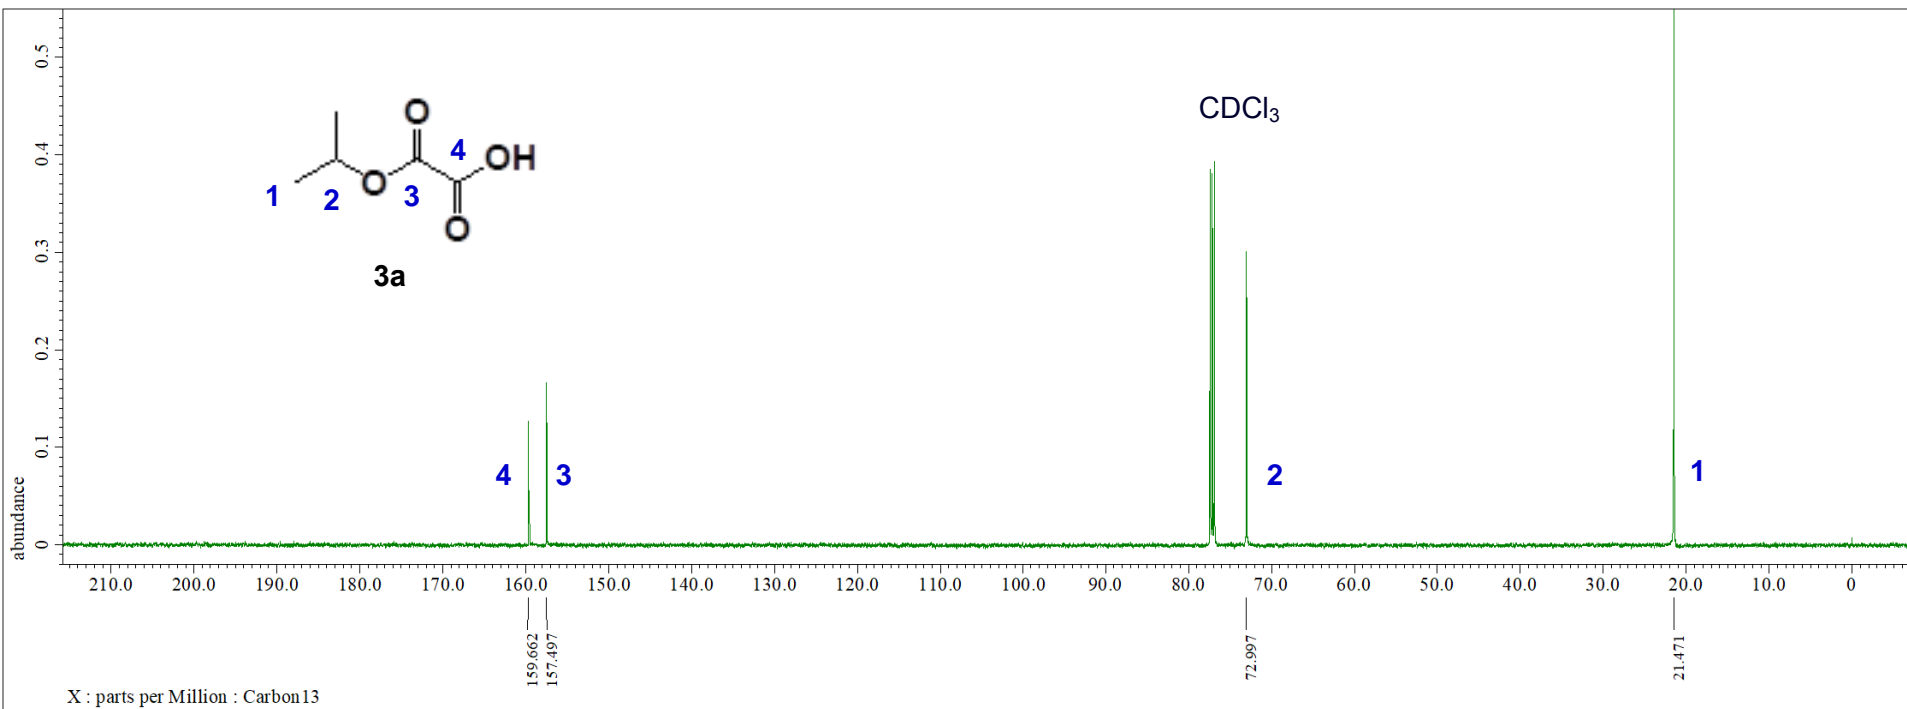

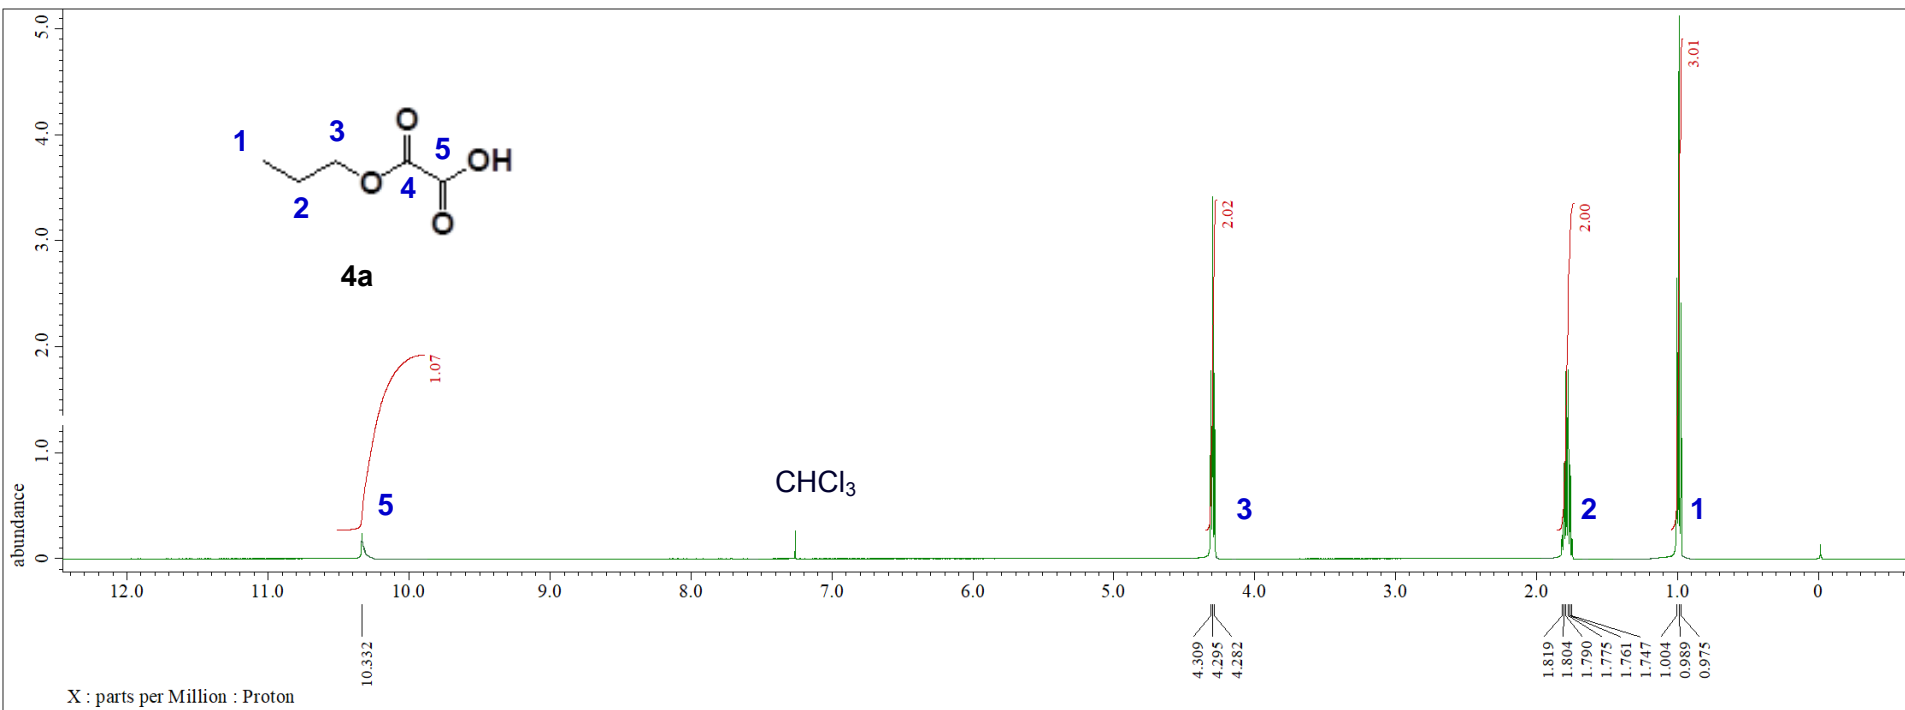



CDCl<sub>3</sub>

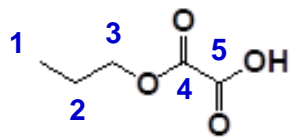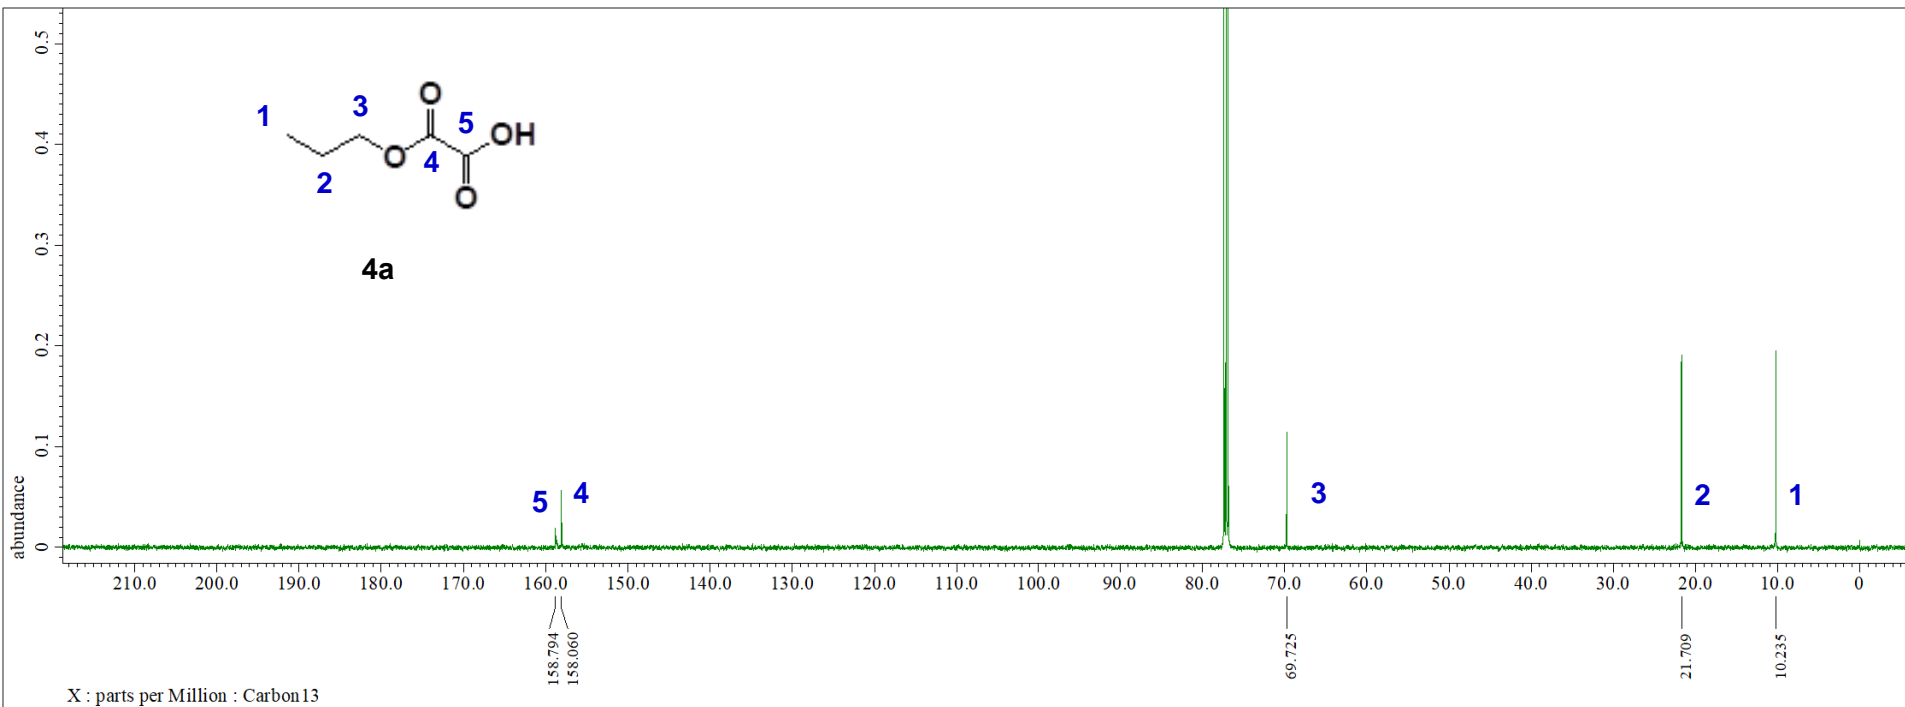

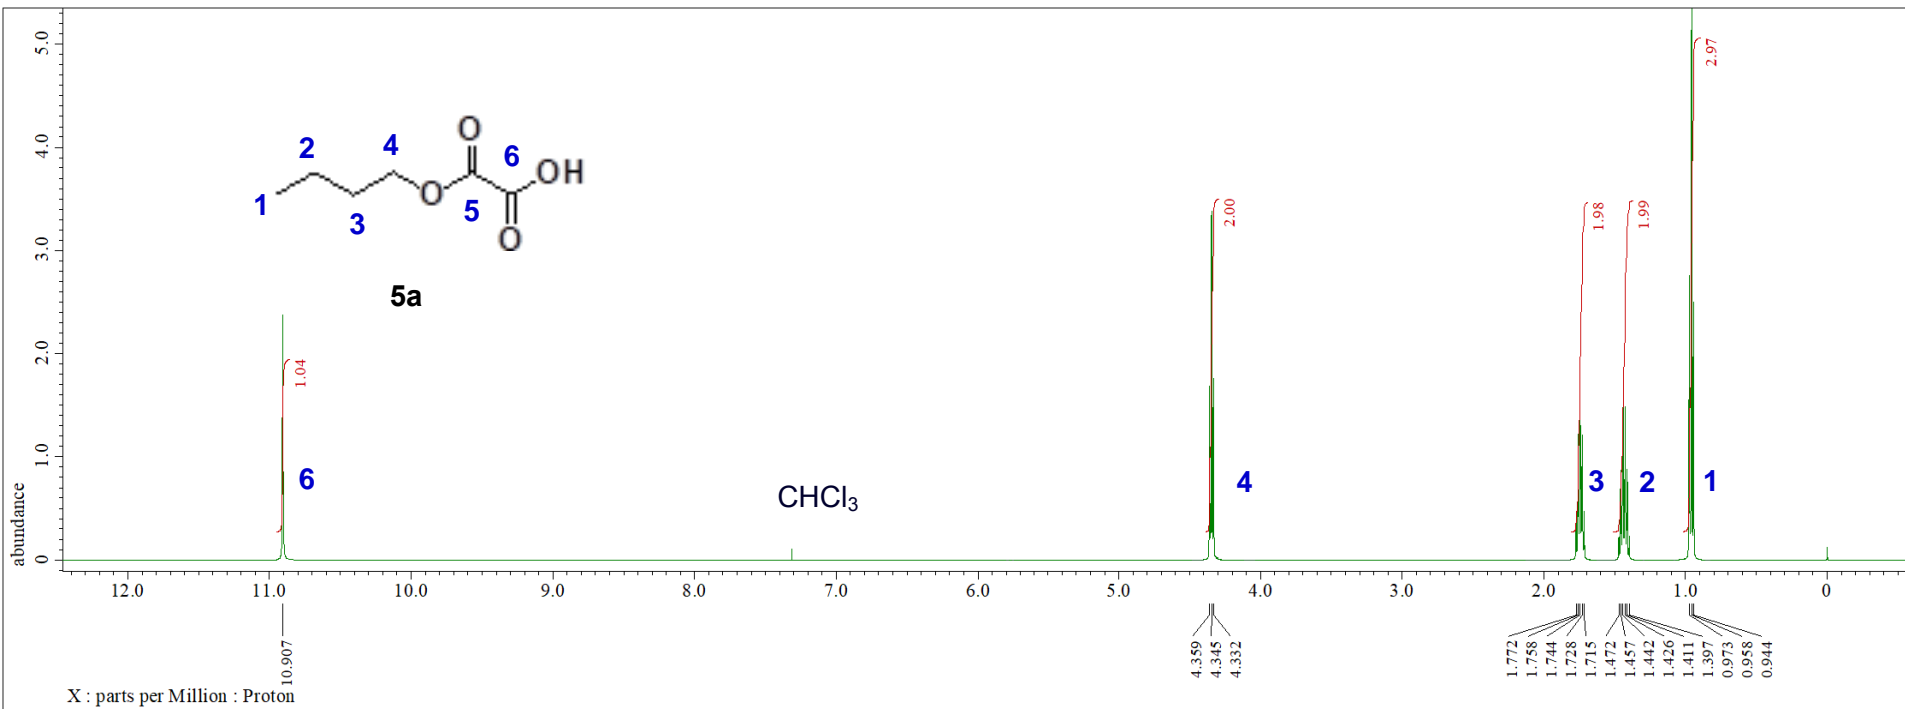

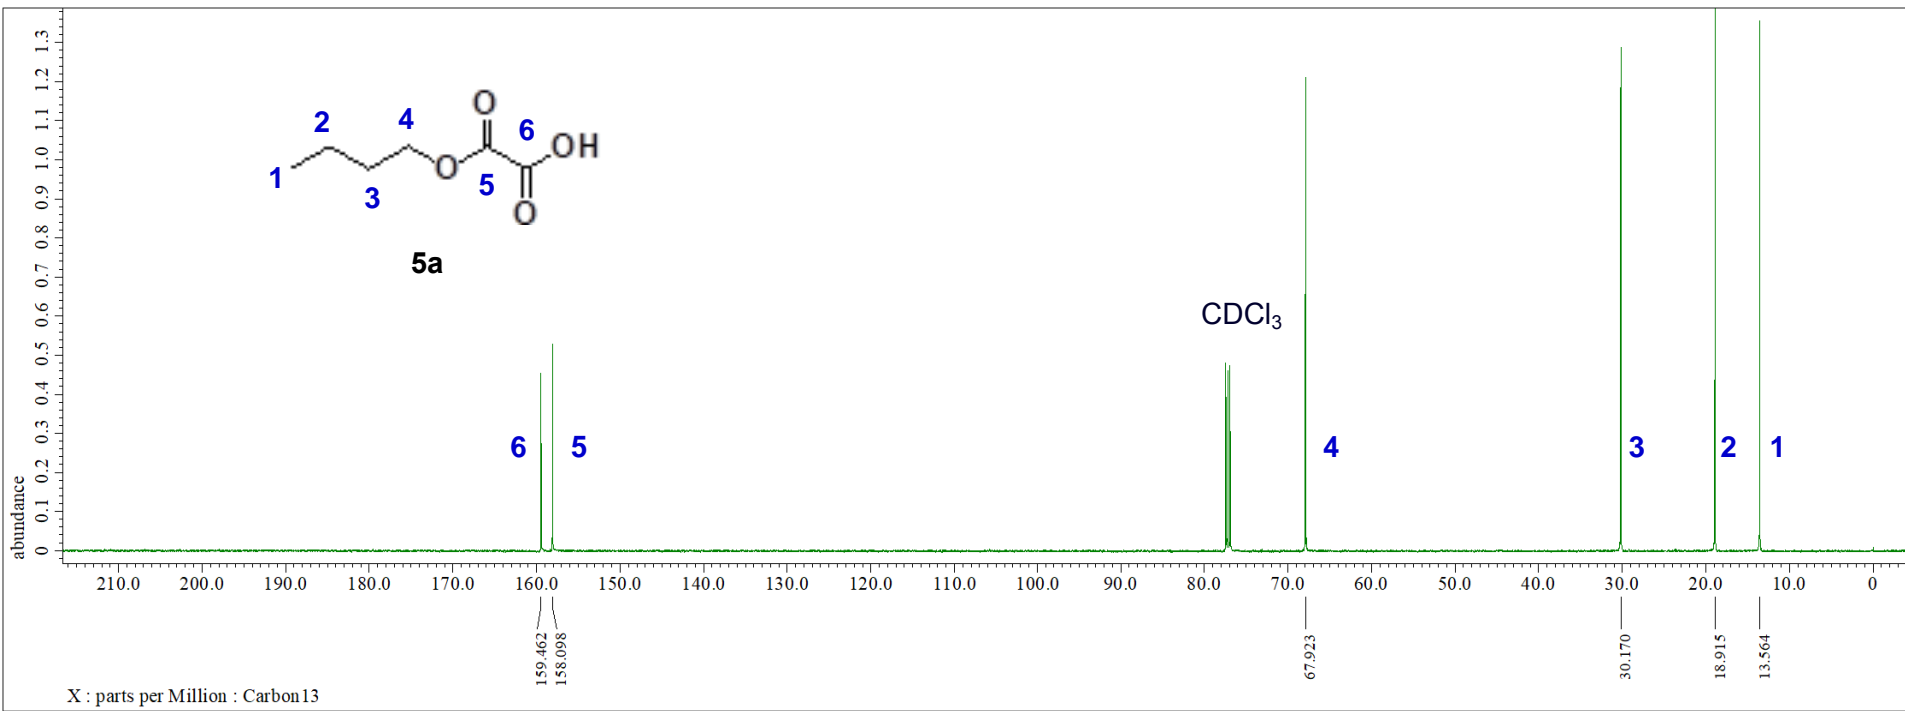

Supplement: d2ra04419f1.pdf [file d2ra04419f1.pdf]
